# Supplementary material
Source: Springer Nature journal article supplement (https://www.springermedizin.de/resource/supplementary/12885_2011_3229_MOESM1_ESM.pdf/9464268)
Supplement: MOESM1 [file 9464268]

# ParvOryx 01

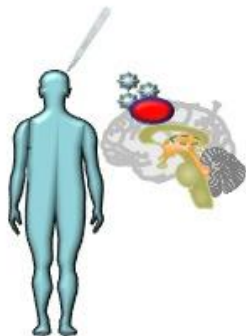

intratumoral catheter placement  
and IMP application

**Study Group 1**  
*Intra- and peritumoral application*

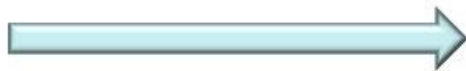

10 days

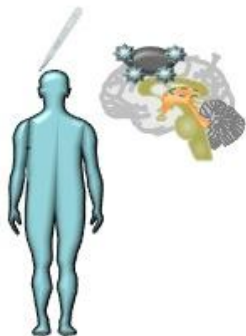

2<sup>nd</sup> surgery, resection of tumor, reapplication of  
IMP into walls of tumor cavity

**Study Group 2**

*i.v. and peritumoral application*

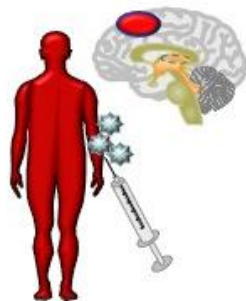

intravenous IMP application

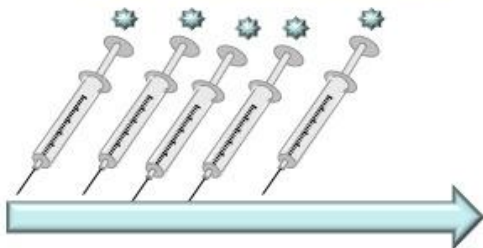

10 days

iv H-1PV days 1 to 5

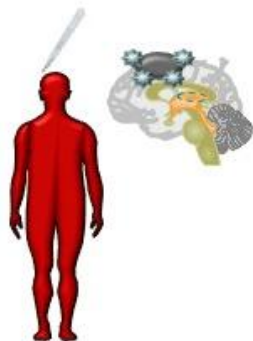

surgery, resection of tumor, reapplication of  
IMP into walls of tumor cavity
